# Supplementary material for: Comment on 'A conserved strategy for inducing appendage regeneration in moon jellyfish, Drosophila, and mice'
Source: eLife. 2023 Jun 22;12:e84435. doi: 10.7554/eLife.84435 (PMC10287152; doi:10.7554/eLife.84435)
Supplement: Table 1—source data 1. [file elife-84435-table1-data1.xlsx]

## Sheet: Sheet1
Raw data
Comment on ‘A conserved strategy for inducing appendage regeneration in moon jellyfish, Drosophila, and mice’
Sustar and Tuthill, 2022
Experiment 1
Genotype: progeny of ChAT-GAL4 x UAS-mdc8::GFP
Flies amputated 3/29/2022
Fly legs fixed 4/19/2022
Mounted in vectashield with DAPI the same day
	flies amputated	flies survived	white blob	cuticle growth	ChAT>GFP in tibia stump
control	100	64	0	0	0
treated	100	50	2	0	0
Experiment 2
Genotype: wild type Canton-S
Flies amputated 7/6/2022
Fly legs fixed 7/27/2022
Stained with phallodin for one week, mounted in Vectashield with DAPI
	flies amputated	flies survived	white blob	cuticle growth	phalloidin in tibia stump
control	100	56	2	0	0
treated	122	72	1	0	0
Experiment 3
Genotype: wild type Canton-S
Flies amputated 7/13/2022
Fly legs fixed 8/3/2022
Stained with phallodin for one week, mounted in Vectashield with DAPI
	flies amputated	flies survived	white blob	cuticle growth	phalloidin in tibia stump
control	100	41	2	0	0
treated	101	55	4	0	0
Experiment 4
Genotype: Wild type Canton-S
Flies were fed EdU throughout the experiment
Flies amputated 8/22/2022
Fly legs and gut (positive EdU control) fixed 9/12/2022
Stained for EdU and mounted in Vectashield with DAPI the same day
	flies amputated	flies survived	white blob	cuticle growth	EdU in tibia stump
control	40	20	1	0	0
treated	100	46	1	0	0
Experiment 5
Genotype: wild type Canton-S
Flies amputated 8/24/2022
Fly legs fixed 9/14/22
Stained with phallodin for one week, mounted in Vectashield with DAPI
	flies amputated	flies survived	white blob	cuticle growth	phalloidin in tibia stump
control	0	N/A	N/A	N/A	N/A
treated	520	325	10	0	0
